# Supplementary material
Source: Elsevier journal article supplement (https://www.sciencedirect.com/science/article/pii/S1885585724002780)
Supplement: mmc1 [file mmc1.pdf]

Jo J, et al. *Clinical impact of visceral adiposity on long-term mortality in patients undergoing coronary artery bypass grafting. Rev Esp Cardiol. 2024.*

**SUPPLEMENTARY DATA**

**Table 1 of the supplementary data.**

Standardized mean difference of matched covariates in the original and IPTW-matched population

|                        | T1 vs T2                |                        | T1 vs T3                |                        | T2 vs T3                |                        |
|------------------------|-------------------------|------------------------|-------------------------|------------------------|-------------------------|------------------------|
|                        | Original population SMD | Matched population SMD | Original population SMD | Matched population SMD | Original population SMD | Matched population SMD |
| Age                    | .011                    | .001                   | .288                    | <.001                  | .315                    | .001                   |
| Sex                    | .076                    | .003                   | .061                    | .007                   | .015                    | .001                   |
| Presentation with AMI  | .176                    | <.001                  | .158                    | .017                   | .018                    | .003                   |
| Hypertension           | .112                    | .002                   | .385                    | .007                   | .271                    | <.001                  |
| Diabetes mellitus      | .006                    | .001                   | .072                    | .007                   | .066                    | .003                   |
| Dyslipidemia           | .145                    | <.001                  | .185                    | .003                   | .040                    | .005                   |
| Current smoking        | .015                    | .001                   | .005                    | .002                   | .020                    | .003                   |
| Chronic kidney disease | .114                    | .001                   | .097                    | .002                   | .017                    | .001                   |
| Previous stroke        | .003                    | .002                   | .044                    | .006                   | .048                    | .006                   |
| Previous MI            | .010                    | <.001                  | .038                    | .005                   | .028                    | .002                   |
| Preoperative LVEF      | .219                    | <.001                  | .317                    | .012                   | .095                    | .001                   |
| Three-vessel disease   | .057                    | .001                   | .019                    | .006                   | .076                    | .004                   |
| Off-pump CABG          | .110                    | <.001                  | .083                    | .006                   | .027                    | .002                   |

AMI, acute myocardial infarction; CABG, coronary artery bypass grafting; IPTW, inverse probability treatment-weighting; LVEF, left ventricular ejection fraction;

MI, myocardial infarction; SMD, standardized mean difference; T1, low visceral fat area index group; T2, intermediate visceral fat area group; T3, high visceral

fat area group.

**Table 2 of the supplementary data.**

Clinical outcomes according to visceral fat area index during a median 8.7-year follow-up after IPTW

|                       | T1 vs T2              |        |                           |      | T1 vs T3              |      |                           |      | T2 vs T3              |      |                           |      |
|-----------------------|-----------------------|--------|---------------------------|------|-----------------------|------|---------------------------|------|-----------------------|------|---------------------------|------|
|                       | Unadjusted HR (95%CI) | P      | IPTW-adjusted HR* (95%CI) | P    | Unadjusted HR (95%CI) | P    | IPTW-adjusted HR* (95%CI) | P    | Unadjusted HR (95%CI) | P    | IPTW-adjusted HR* (95%CI) | P    |
| All-cause death       | 1.46 (1.24-1.72)      | < .001 | 1.27 (1.08-1.50)          | .004 | 1.28 (1.09-1.50)      | .002 | 1.32 (1.12-1.56)          | .001 | 0.87 (0.73-1.03)      | .116 | 1.05 (0.89-1.26)          | .551 |
| Myocardial infarction | 1.00 (0.47-2.13)      | > .999 | 0.94 (0.44-2.01)          | .865 | 1.34 (0.59-3.06)      | .486 | 1.07 (0.41-2.76)          | .895 | 1.31 (0.58-2.96)      | .509 | 1.16 (0.48-2.76)          | .746 |
| Any revascularization | 1.58 (0.85-2.93)      | .144   | 1.79 (0.96-3.34)          | .069 | 1.04 (0.59-1.80)      | .903 | 0.92 (0.50-1.69)          | .786 | 0.65 (0.35-1.21)      | .173 | 0.56 (0.30-1.07)          | .079 |
| Stroke                | 0.95 (0.61-1.50)      | .836   | 0.96 (0.61-1.53)          | .874 | 1.16 (0.72-1.86)      | .553 | 1.22 (0.74-2.01)          | .430 | 1.21 (0.76-1.92)      | .428 | 1.30 (0.81-2.10)          | .273 |
| MACCE                 | 1.37 (1.18-1.60)      | < .001 | 1.24 (1.06-1.45)          | .007 | 1.25 (1.07-1.46)      | .004 | 1.28 (1.09-1.51)          | .002 | 0.91 (0.77-1.07)      | .234 | 1.05 (0.89-1.24)          | .531 |

\*The IPTW analyses were conducted using propensity scores. Residual differences in baseline characteristics between the matched cohorts were assessed by calculating the absolute standardized mean differences. These differences were less than 0.1 for all matched covariates (age, sex, presentation with acute myocardial infarction, hypertension, diabetes mellitus, dyslipidemia, current smoking, chronic kidney disease, previous stroke, previous myocardial infarction, preoperative left ventricular ejection fraction, three-vessel disease, and off-pump coronary artery bypass grafting), indicating a good balance.

95%CI, 95% confidence interval; HR, hazard ratio; IPTW, inverse probability treatment-weighting; MACCE, major adverse cardiovascular and cerebrovascular event; MI, myocardial infarction; T1, low visceral fat area index group; T2, intermediate visceral fat area group; T3, high visceral fat area group.

Jo J, et al. *Clinical impact of visceral adiposity on long-term mortality in patients undergoing coronary artery bypass grafting. Rev Esp Cardiol. 2024.*

**Table 3 of the supplementary data.**

Clinical outcomes according to visceral fat area index during the median 8.7-year follow-up using competing risk event analysis

|                       | Low<br>(n = 937) | Intermediate<br>(n = 937) | High<br>(n = 936) | T1 vs T2            |     |      | T1 vs T3            |     |      | T2 vs T3            |     |      |
|-----------------------|------------------|---------------------------|-------------------|---------------------|-----|------|---------------------|-----|------|---------------------|-----|------|
|                       |                  |                           |                   | Adjusted<br>(95%CI) | HR* | P    | Adjusted<br>(95%CI) | HR* | P    | Adjusted<br>(95%CI) | HR* | P    |
| Myocardial infarction | 13 (1.4%)        | 14 (1.6%)                 | 10 (2.9%)         | 0.91 (0.42-1.98)    |     | .820 | 1.13 (0.45-2.84)    |     | .800 | 1.17 (0.51-2.69)    |     | .700 |
| Any revascularization | 25 (2.8%)        | 17 (1.9%)                 | 25 (2.8%)         | 1.69 (0.90-3.15)    |     | .100 | 0.94 (0.50-1.76)    |     | .840 | 0.59 (0.31-1.14)    |     | .120 |
| Stroke                | 36 (5.1%)        | 40 (4.9%)                 | 32 (5.6%)         | 0.90 (0.57-1.44)    |     | .660 | 1.19 (0.71-2.01)    |     | .510 | 1.33 (0.81-2.16)    |     | .260 |

For clinical outcomes, all-cause death was treated as a competing event. Data are expressed as event number (cumulative incidence) at 14 years (median 8.7 years).

\*Adjusted for variables of age, sex, presentation with acute myocardial infarction, hypertension, diabetes mellitus, dyslipidemia, current smoking, chronic kidney disease, previous stroke, previous MI, preoperative left ventricular ejection fraction, three-vessel disease, and off-pump coronary artery bypass grafting. 95%CI, 95% confidence interval; HR, hazard ratio; MI, myocardial infarction; T1, low visceral fat area index group; T2, intermediate visceral fat area group; T3, high visceral fat area group.

Jo J, et al. *Clinical impact of visceral adiposity on long-term mortality in patients undergoing coronary artery bypass grafting. Rev Esp Cardiol. 2024.*

Figure 1 of the supplementary data. Distribution of the visceral fat area index.

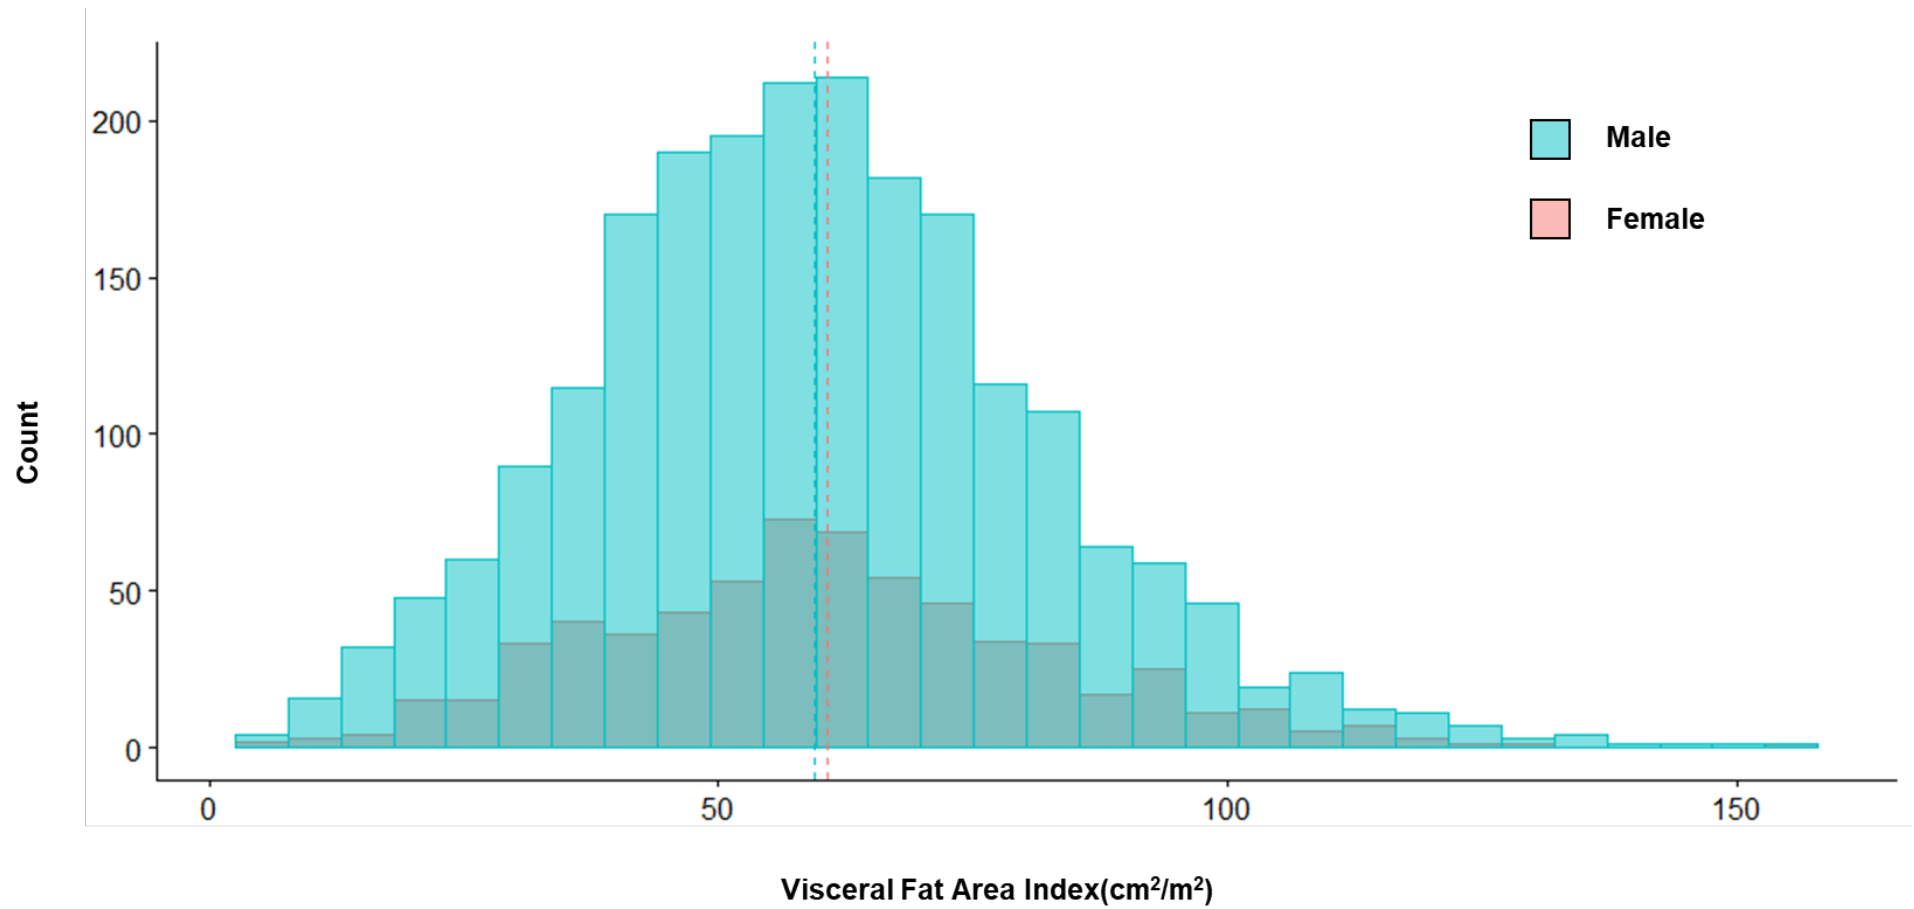

Corrección: Visceral fat area index (cm²/m²)

Jo J, et al. *Clinical impact of visceral adiposity on long-term mortality in patients undergoing coronary artery bypass grafting.* Rev Esp Cardiol. 2024.

Jo J, et al. Clinical impact of visceral adiposity on long-term mortality in patients undergoing coronary artery bypass grafting. Rev Esp Cardiol. 2024.

Figure 2 of the supplementary data. Balance after IPTW.

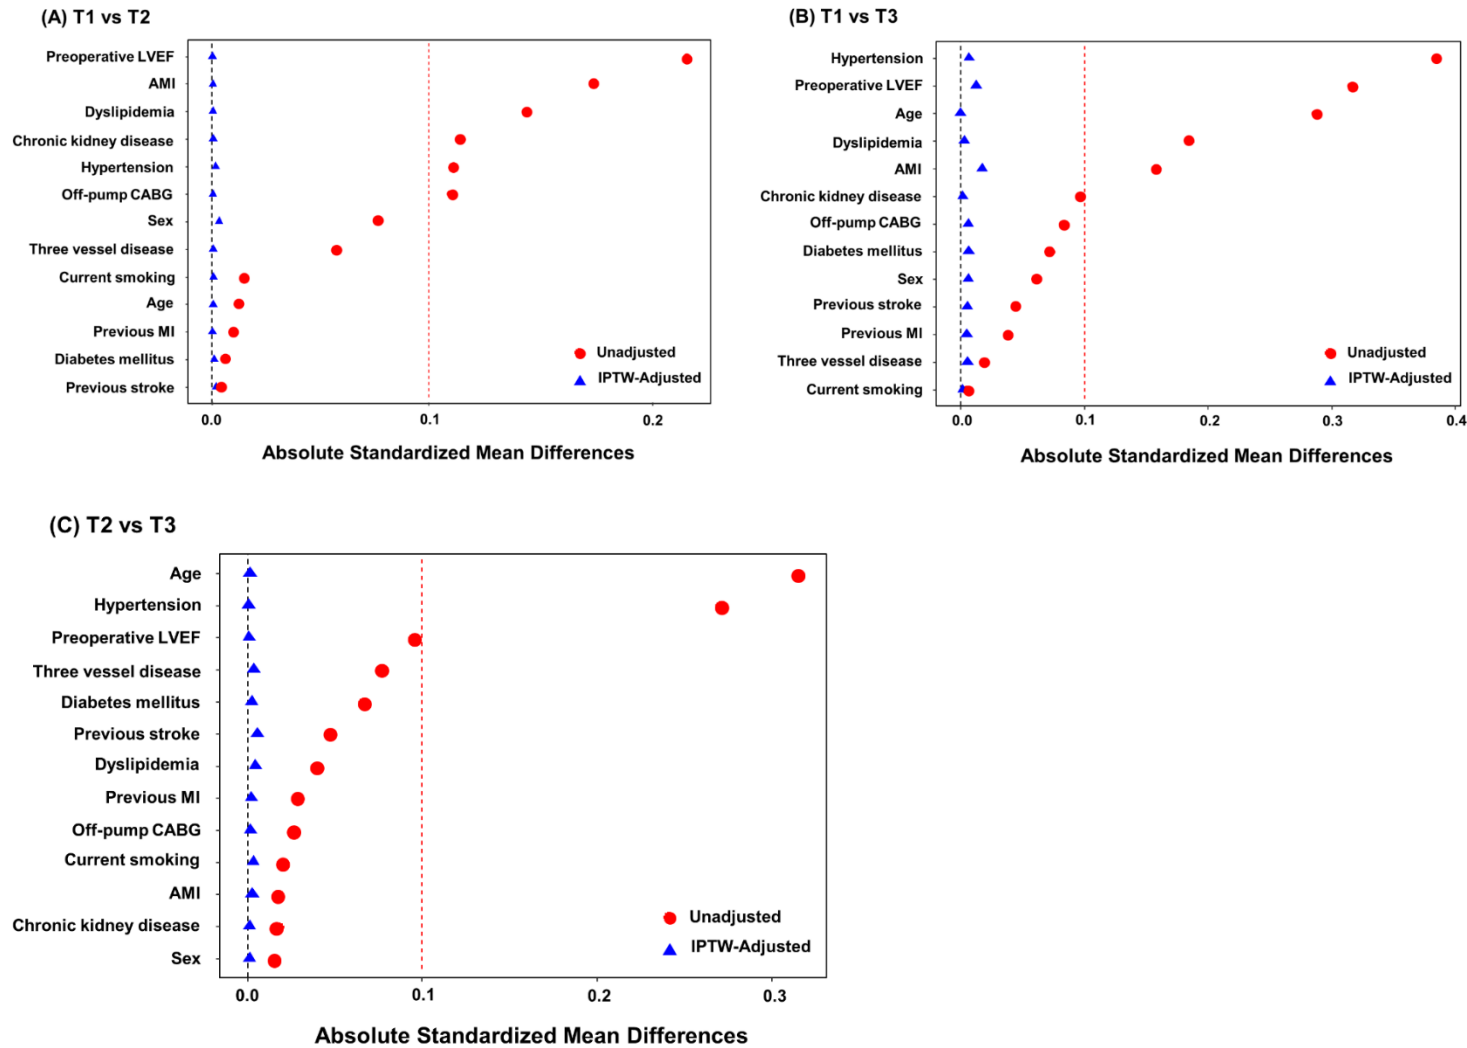

Jo J, et al. *Clinical impact of visceral adiposity on long-term mortality in patients undergoing coronary artery bypass grafting. Rev Esp Cardiol. 2024.*

Standardized mean differences were less than 0.1 for all matched covariates after IPTW.

AMI, acute myocardial infarction; CABG, coronary artery bypass grafting; IPTW, inverse probability treatment-weighting; LVEF, left ventricular ejection fraction;

T1, low visceral fat area index group; T2, intermediate visceral fat area group; T3, high visceral fat area group.

Corrección a la figura: cambiar “three vessel” a “three-vessel”

Cambiar “Absolute Standardized Mean Differences” a “Absolute standardized mean differences”

Cambiar “IPTW-Adjusted” a “IPTW-adjusted” (x 3)
